# Supplementary material
Source: publisher figshare collection journal article supplement (https://geolsoc.figshare.com/ndownloader/files/24309060)

Supplementary materials for “Subduction-related subcontinental lithospheric mantle metasomatism and crustal thickening: origin for superchondritic Nb/Ta in mafic dykes”

Xiang Cui, Wenbin Zhu, Fred Jourdan

Supplementary Figure S1. Representative photomicrographs for mafic dykes in the eastern Jiangnan Orogen. Cpx, clinopyroxene; Pl, plagioclase; Chl, chlorite; Cal, calcite. (a) Photomicrograph of sample 12gys-1. (b) Thin section photomicrograph of sample 12gys-2 containing some calcite. (c) Photomicrograph of sample 14gys-1 with partly chloritization. (d) Photomicrograph of sample 14gys-2 showing anhedral clinopyroxene and altered euhedral plagioclase. (e) Photomicrograph of sample 14gys-4. (f) Photomicrograph of sample 14gys-9 showing heavy alteration of plagioclase.

Supplementary Figure S2. Mafic dykes from the eastern Jiangnan Orogen plotted in various geochemical diagrams. (a) TAS plot after [Le Bas et al. \(1986\)](#). (b)  $\text{FeO}_t/\text{MgO}$  versus  $\text{SiO}_2$  diagram of [Miyashiro \(1974\)](#).

Supplementary Figure S3. Chondrite-normalized REE patterns and primitive-mantle-normalized incompatible trace element spider diagram for the mafic dykes in the eastern Jiangnan Orogen. Chondrite and primitive-mantle values are from [McDonough and Sun \(1995\)](#). Solid lines represent samples analyzed in this study, dotted-dashed lines represent average data for ocean-island basalt ([Sun and McDonough, 1989](#)) and continental-arc basalt ([Kelemen et al., 2003](#)).

Supplementary Figure S4. LOI against Nb/Ta and La/Yb of mafic dykes in the eastern Jiangnan Orogen. No obvious correlation suggests little disturbance of Nb/Ta or La/Yb by alteration.

Supplementary figure S1

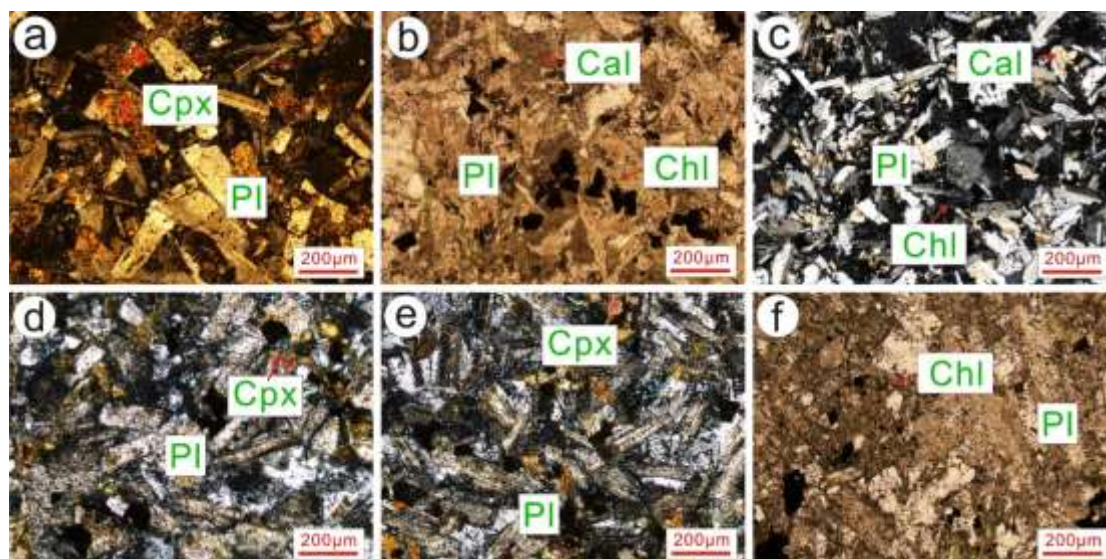

Supplementary figure S2

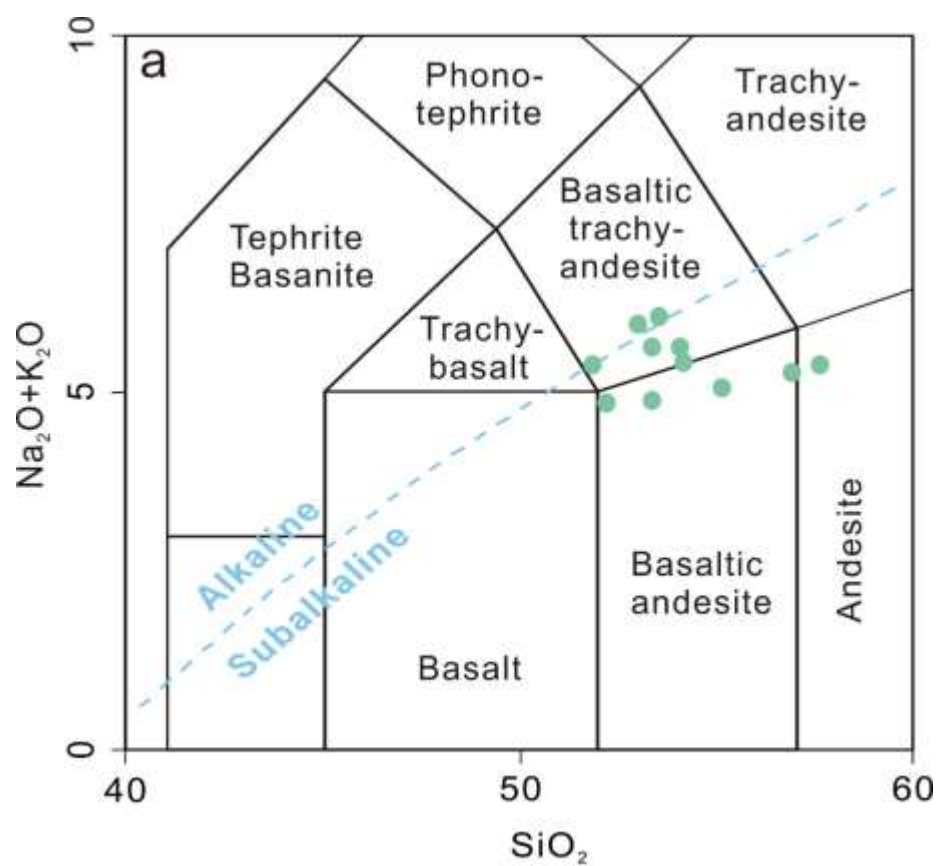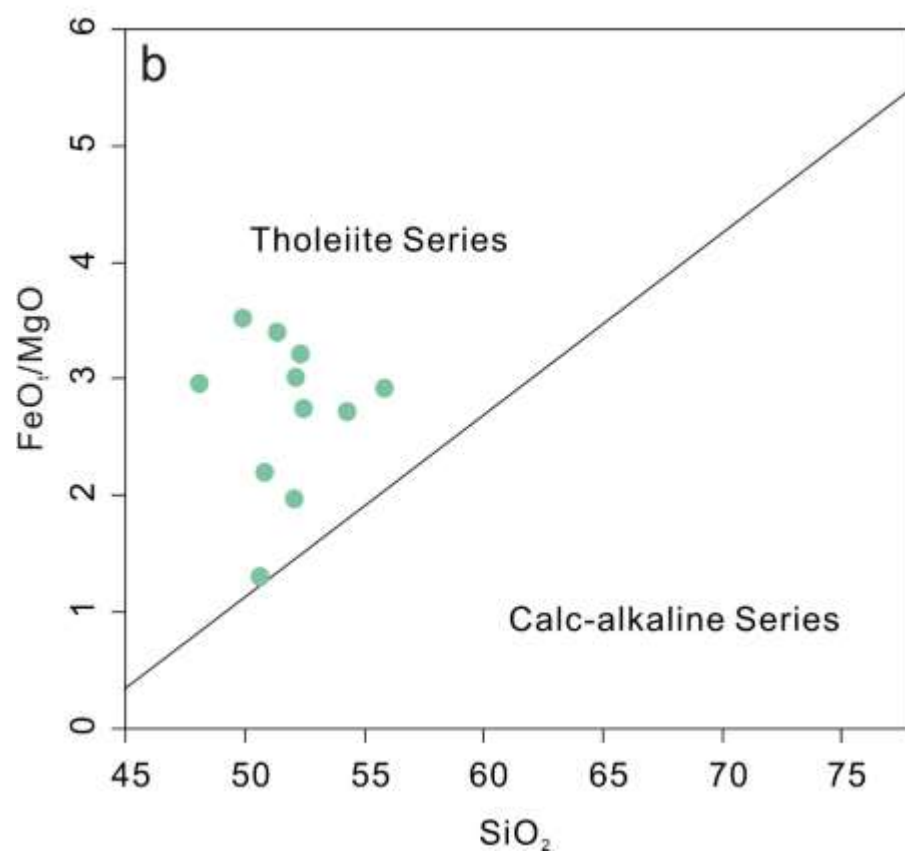

Supplementary figure S3

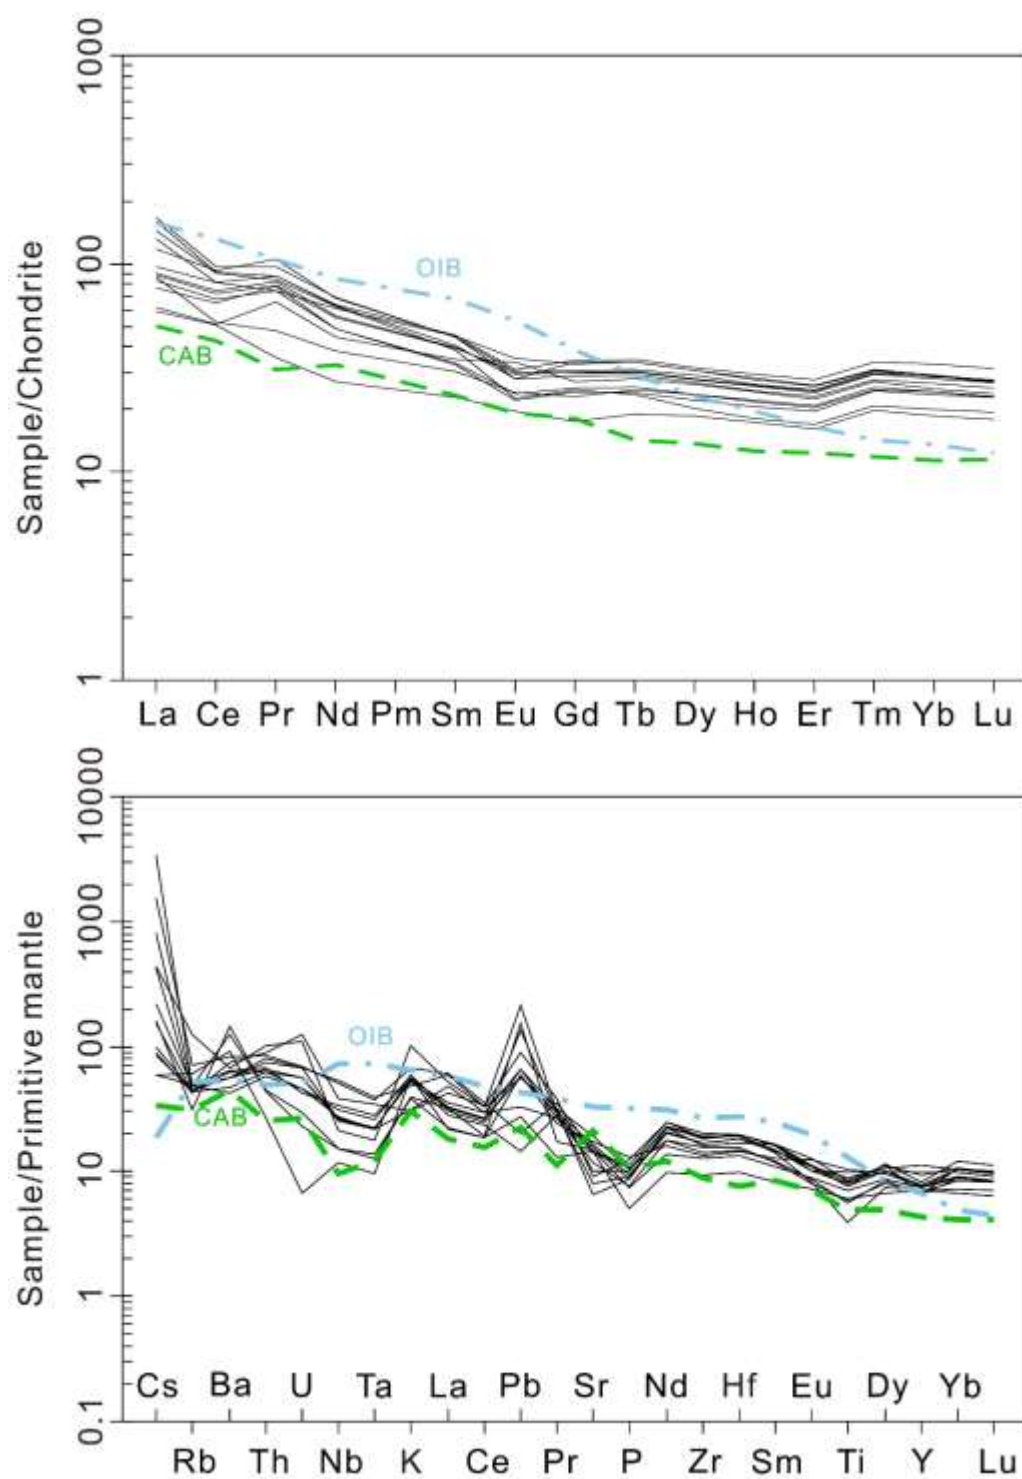

Supplementary figure S4

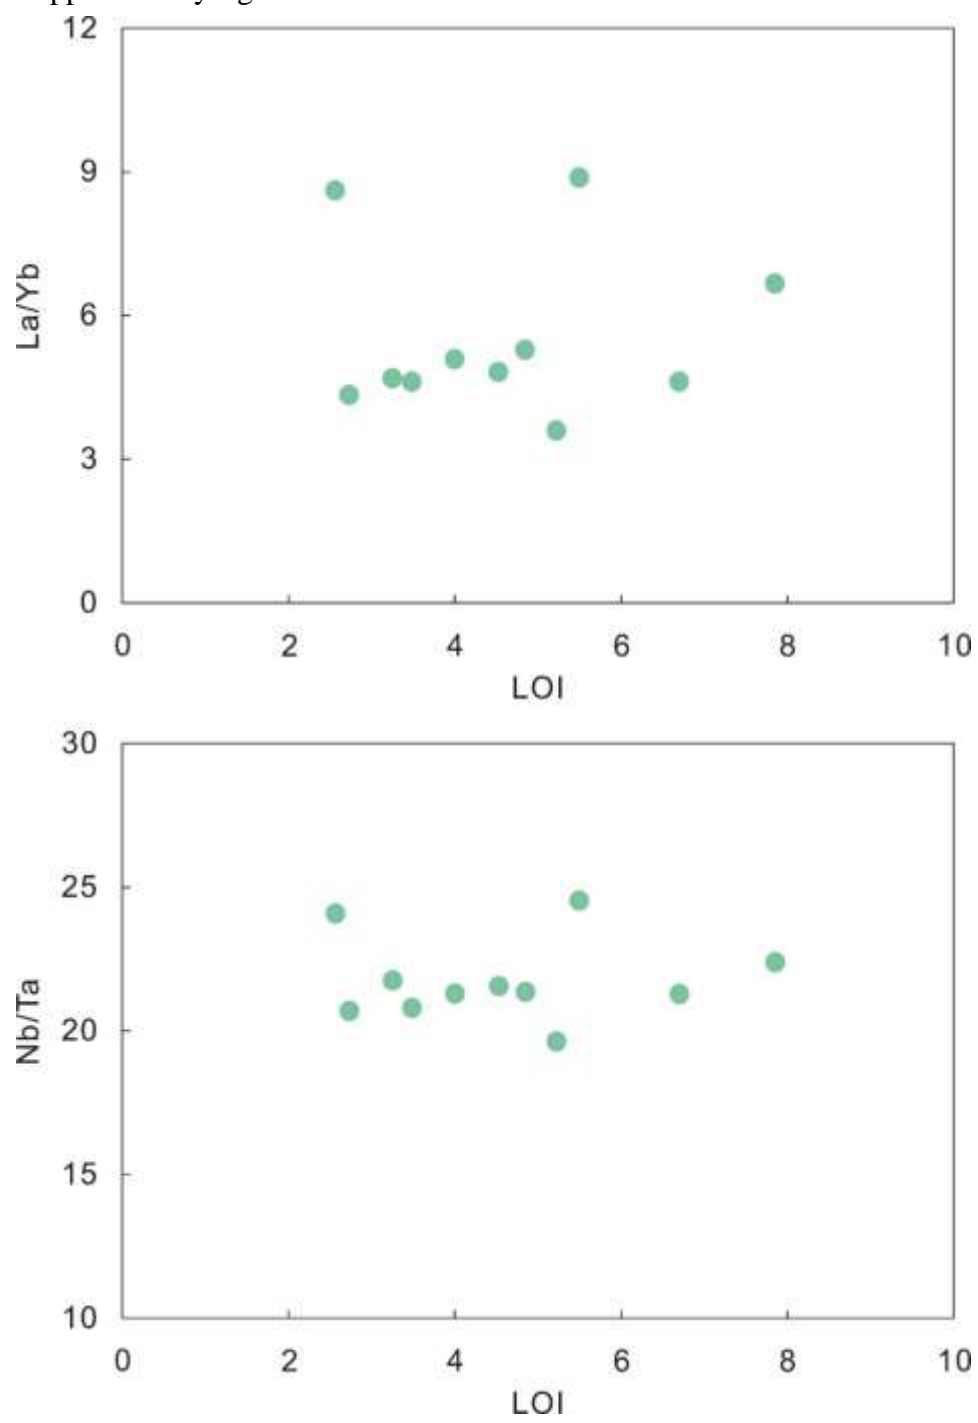

Supplement: Supplementary file 1 [file 24309060]
